# Supplementary material
Source: Springer Nature journal article supplement (https://www.springermedizin.de/resource/supplementary/12885_2012_3804_MOESM10_ESM.pdf/9464500)

**in vitro sensitivity**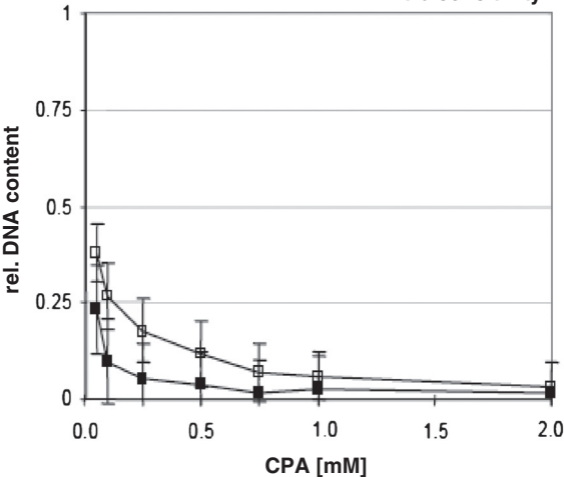**□ — HUH-wt + 25% X39****■ — HUH-REISO + 25% X39**

Supplement: MOESM10 [file 9464500]
